# Supplementary material for: Quantification of [11C]ABP688 binding in human brain using cerebellum as reference region: biological interpretation and limitations
Source: bioRxiv or medRxiv preprint supplement (doi:10.1101/2024.02.12.24302279), 2024-02-13
Supplement: Supplementary file [file media-1.pdf]

## Supplementary Information

**Table 1.** Demographics from donors of tissue specimens used in the present study. There were no group differences (AR vs. IHC) in age ( $p=0.9$ ;  $t=0.09$ ;  $df=9$ ) or postmortem processing time to freezing/fixation ( $p=0.2$ ;  $t=1.38$ ;  $df=9$ ).

| Specimen | Experiment | Age range | Sex | Postmortem Delay (hours) | Side | Cause of Death/Diagnosis           |
|----------|------------|-----------|-----|--------------------------|------|------------------------------------|
| 1        | AR         | 70-80     | M   | 20.5                     | R    | Larynx neoplasia                   |
| 2        | AR         | 80-90     | F   | 32.5                     | R    | Acute Myocardial Infarct           |
| 3        | AR         | 70-80     | F   | 19.7                     | R    | Renal failure                      |
| 4        | AR         | 40-50     | F   | 43.7                     | L    | Lung neoplasia                     |
| 5        | AR         | 70-80     | F   | 17.2                     | L    | Acute Myocardial Infarct           |
| 6        | IHC        | 90-100    | F   | 23.75                    | L    | Hepatic Metastasis                 |
| 7        | IHC        | 80-90     | M   | 26.75                    | L    | Lung Carcinoid Tumor               |
| 8        | IHC        | 80-90     | M   | 8                        | L    | Ruptured abdominal aortic aneurism |
| 9        | IHC        | 50-60     | F   | 26.25                    | L    | Metastatic lung cancer             |
| 10       | IHC        | 60-70     | M   | 8.75                     | L    | Pancreatic neoplasm                |
| 11       | IHC        | 50-60     | M   | 17.67                    | L    | Gastric neoplasm                   |

Legends: AR (autoradiography), IHC (immunohistochemistry), F (female), M (male), R (right), L (left).
